# Supplementary material for: Combined Computer-Aided Predictors to Improve the Thermostability of Nattokinase
Source: MDPI journal article supplement (doi:10.3390/foods12163045), 2023-08-14
Supplement: s1 [file s1]

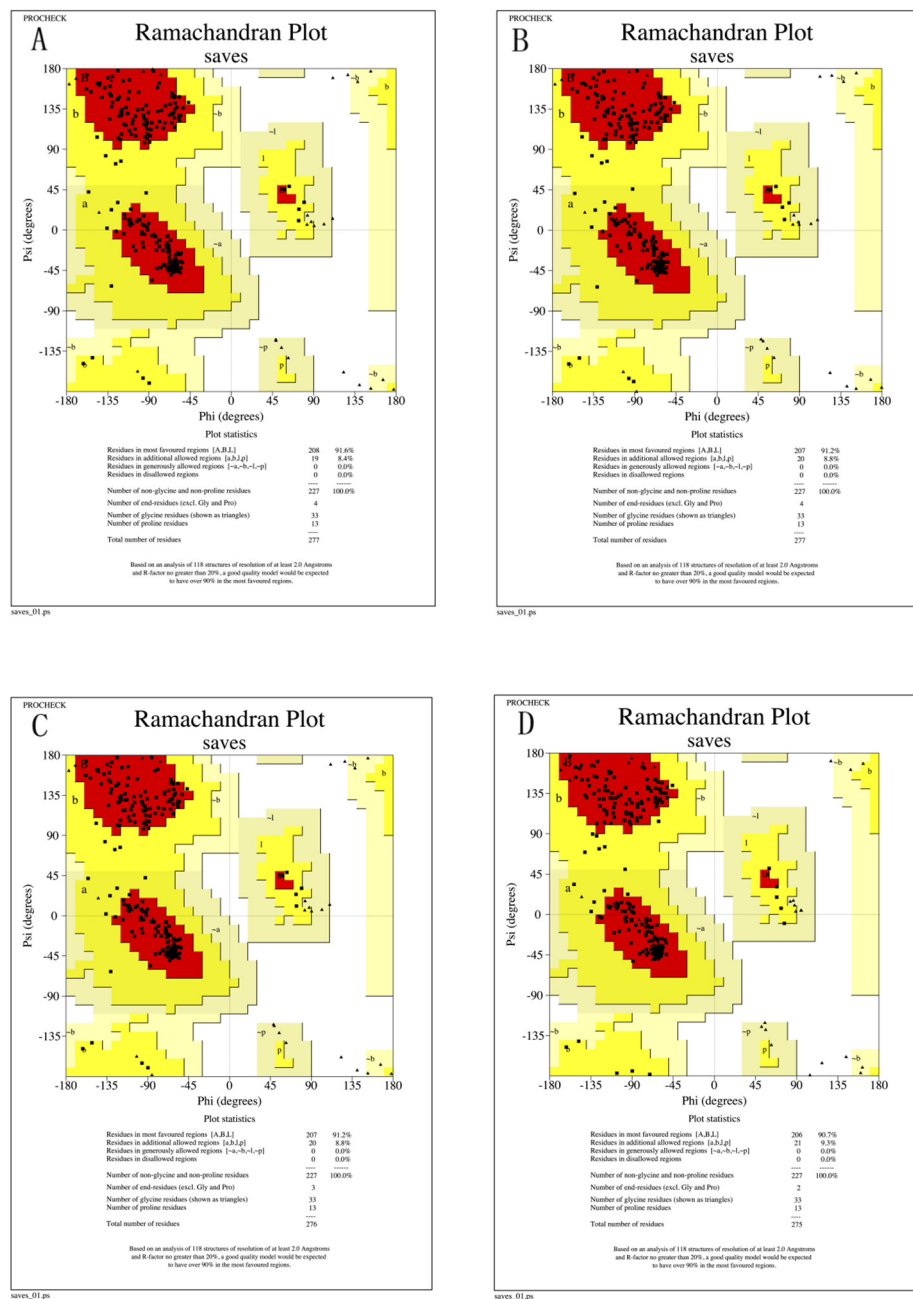

**Figure S1 .** Ramachandran plots of rAprY and its variants: (A) wild type rAprY; (B) S33T; (C) T174V; (D)S33T-T174V. Residues in the most favored regions are shown in red. Residues in additionally allowed regions are shown in yellow.

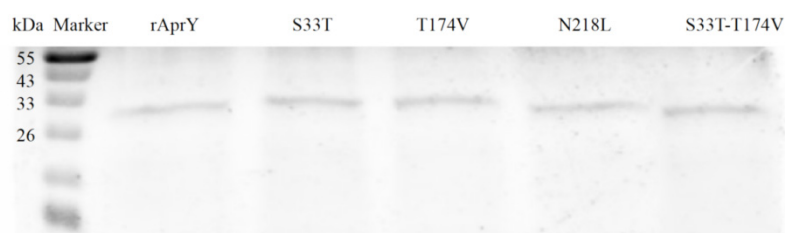

**Figure S2.** SDS-PAGE of purified rAprY and its variants. Lane Marker: Standard marker protein with molecular weights 14.3–200 kDa. The arrow indicates the corresponding bands of mature enzymes.

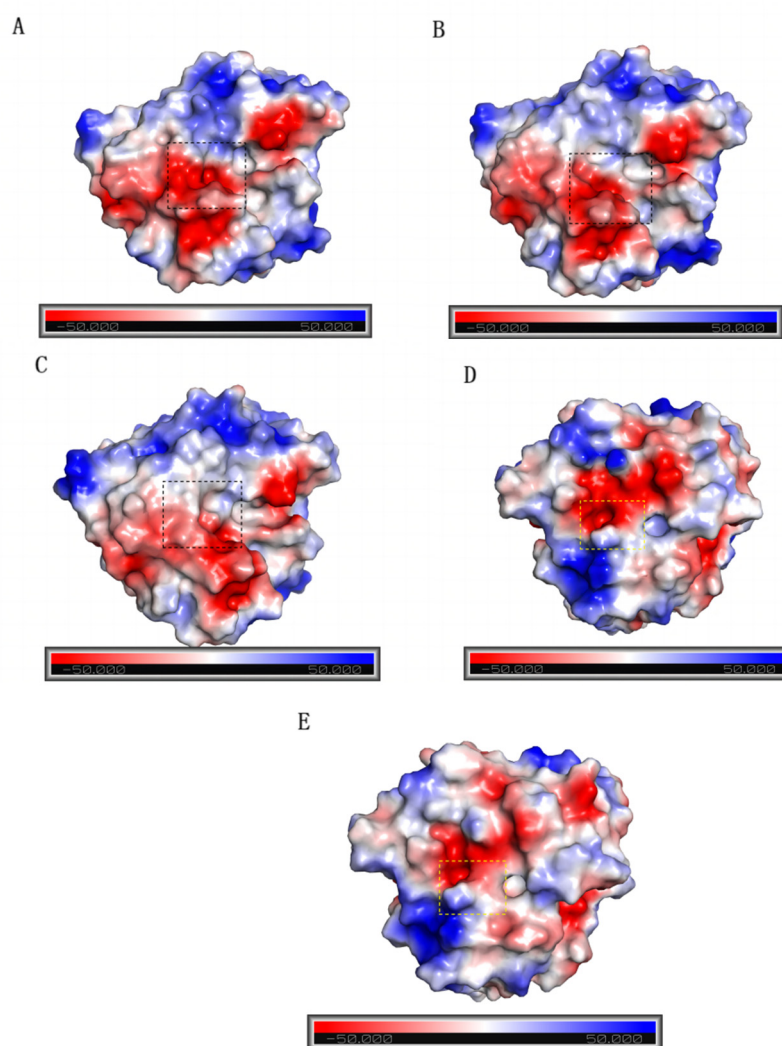

**Figure S3.** Surface charge analysis of rAprY and its variants. (A) and (D): rAprY; (B) S33T; (C) N218L; (E) T174V; The catalytic center region of the enzyme is marked by a black dashed box; The region of amino acid residue 174 is marked by yellow dashed boxes.

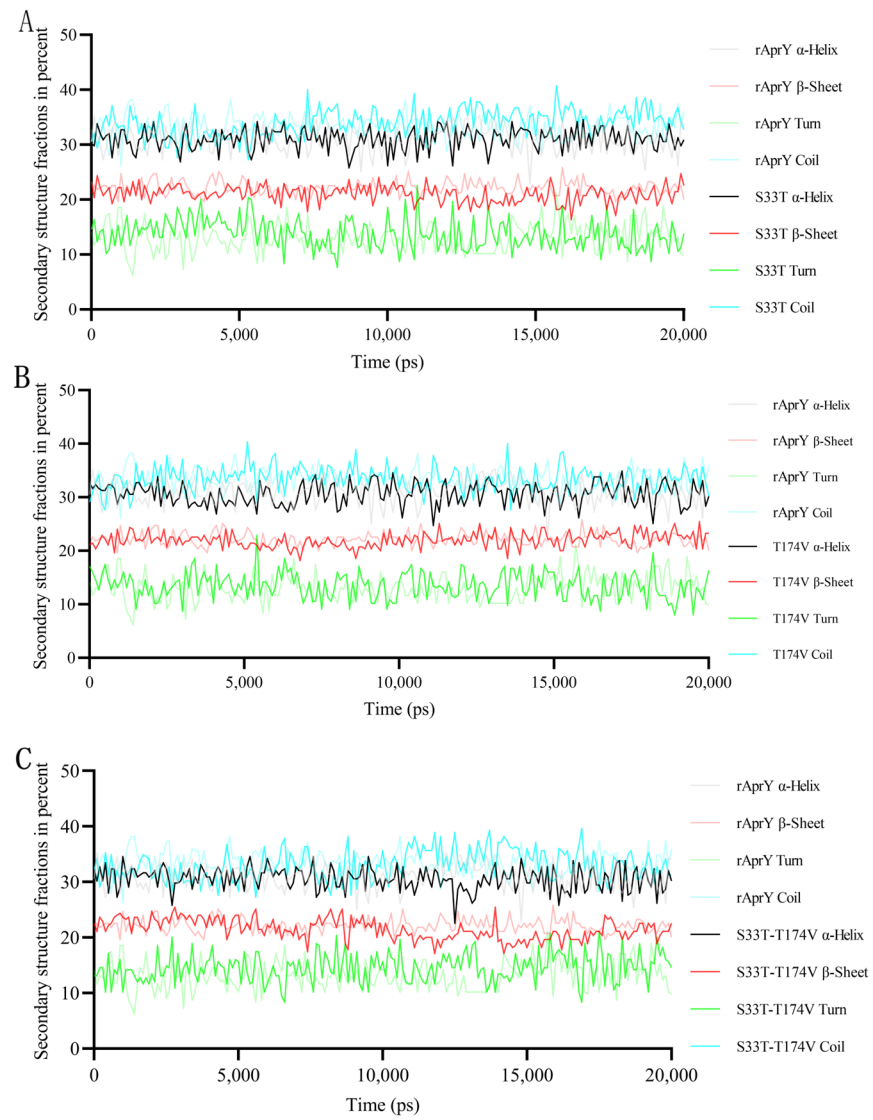

**Figure S4.** Protein secondary structure content (vertical axis) as a function of simulation time (horizontal axis). (A) rAprY and S33T; (B) rAprY and T174V; (C) rAprY and S33T-T174V.

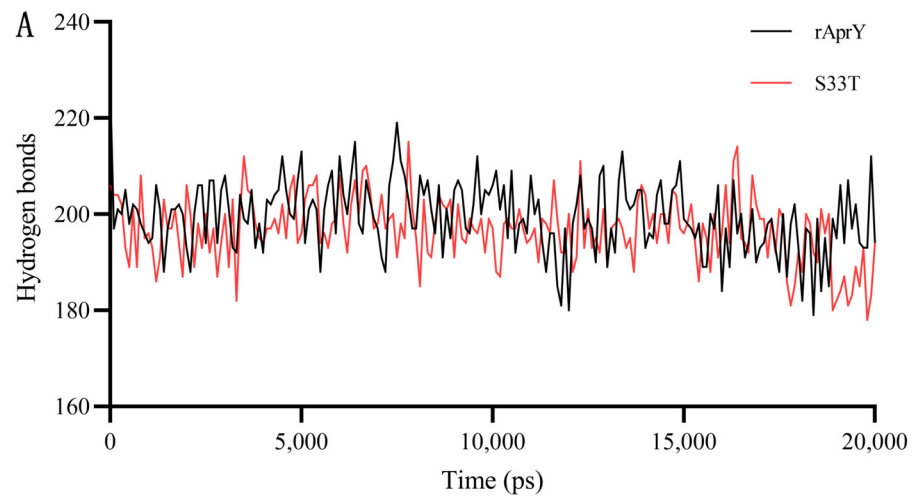

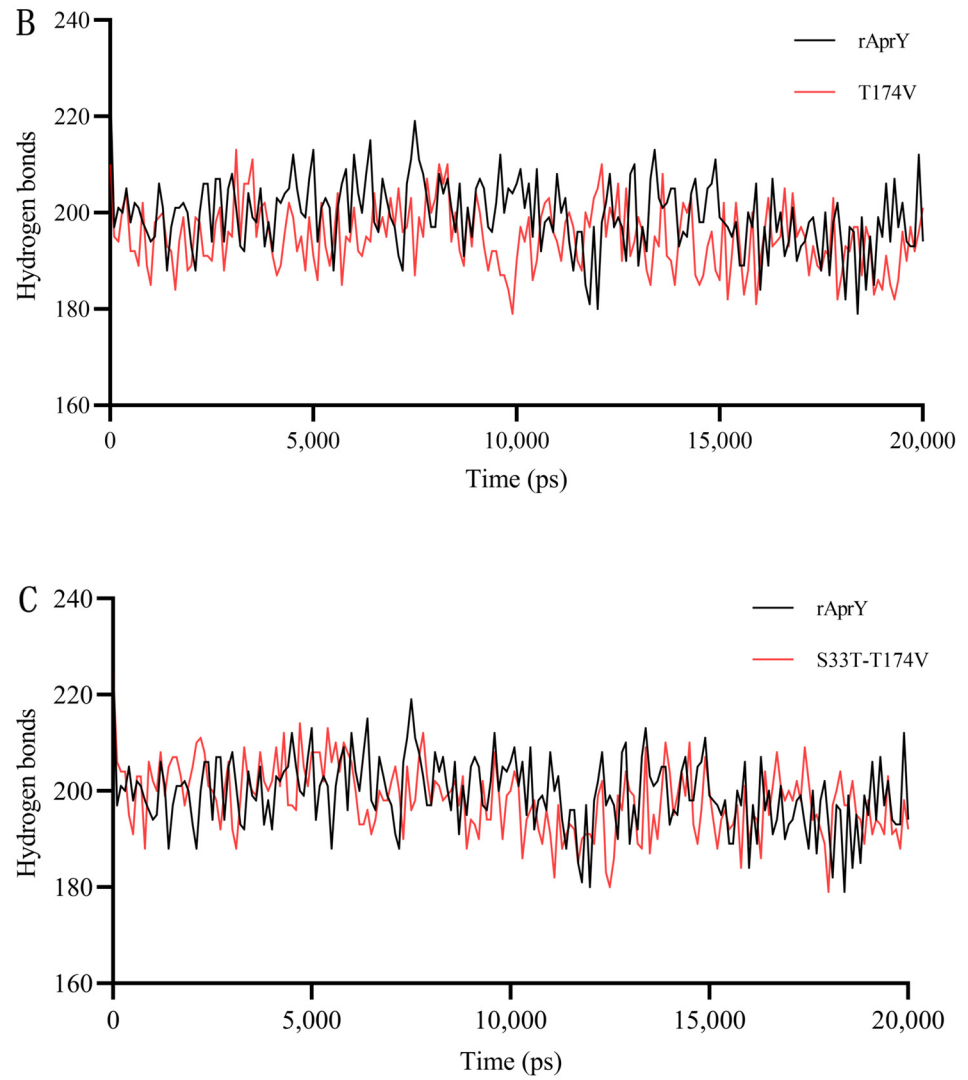

**Figure S5.** Number of hydrogen bonds (vertical axis) as a function of simulation time (horizontal axis). (A) rAprY and S33T; (B) rAprY and T174V; (C) rAprY and S33T-T174V.

Table S1 Primers used for site-directed mutagenesis.

| Primer name | Gene sequence (5'-3')        |
|-------------|------------------------------|
| S204M-up    | atggctcctggcgtgatgatccaaagca |
| S204M-down  | catcacgccaggagccattacatcaagc |
| S105L-up    | ggaagcggccaatatctatggattatta |
| S105L-down  | tagatattggccgcttctgttgaatca  |
| S89I-up     | acaaacgcgcaagtcattgatcgtttag |
| S89I-down   | tattgcgcttggcgctacgccagaaca  |
| R247I-up    | acaaacgcgcaagtcattgatcgtttag |
| R247I-down  | aatgacttgcgcgtttgtccaagtcggg |
| S204L-up    | atggctcctggcgtgttaatccaaagca |
| S204L-down  | taacacgccaggagccattacatcaagc |

---

|            |                               |
|------------|-------------------------------|
| H226F-up   | tccatggcgactccttctgttgccggag  |
| H226F-down | gaaaggagtcgccatggacgttccgtta  |
| S53I-up    | gcaagcttcgttcctattgaaacaaacc  |
| S53I-down  | aataggaacgaagcttgctccgcctctg  |
| N218M-up   | acttacggcgcttatatgggaacgtcca  |
| N218M-down | catataagcgccgtaagtgcctccagga  |
| N218L-up   | acttacggcgcttatctaggaacgtcc   |
| N218L-down | tagataagcgccgtaagtgcctccagga  |
| N25G-up    | ggctacacaggctctggcgtaaaagtag  |
| N25G-down  | gccagagcctgtgtagccttgagagtga  |
| S33T-up    | gtagctgttatcgacaccggaattgact  |
| S33T-down  | ggtgtcgataacagctacttttacgtta  |
| S63G-up    | taccaggacggcagtggtcacggtacgc  |
| S63G-down  | accactgccgtcctggtatgggtttgtt  |
| V121I-up   | tccaacaatatggatattatcaacatga  |
| V121I-down | aatatccatattgttgaaatggcccac   |
| A150V-up   | agcgggtatcgtcgttggtgccgcagccg |
| A150V-down | aacaacgacgataccgctggaaaccgct  |
| T174V-up   | gcaaaatatccttctgttattgcagtag  |
| T174V-down | aacagaaggatatttgcagggtagaag   |
| N181D-up   | gcagtaggtgcggtagacagcagcaacc  |
| N181D-down | gtctaccgcacctactgcaatagtagaa  |
| G110P-up   | agctggattattaaccccattgagtggg  |
| G110P-down | ggggttaataatccagctatattggccg  |
| A114P-up   | aacggcattgagtggccatttccaaca   |
| A114P-down | gggccactcaatgccgttaataatccag  |

---
